# Supplementary material for: The Peroxisome Proliferator-Activated Receptor γ Agonist Pioglitazone Protects Vascular Endothelial Function in Hypercholesterolemic Rats by Inhibiting Myeloperoxidase
Source: Hindawi journal article supplement (doi:10.1155/2020/1845969), 2020-01-07
Supplement: f1 [file 1845969.f1.pdf]

## Supplementary Materials

### Supplementary figure:

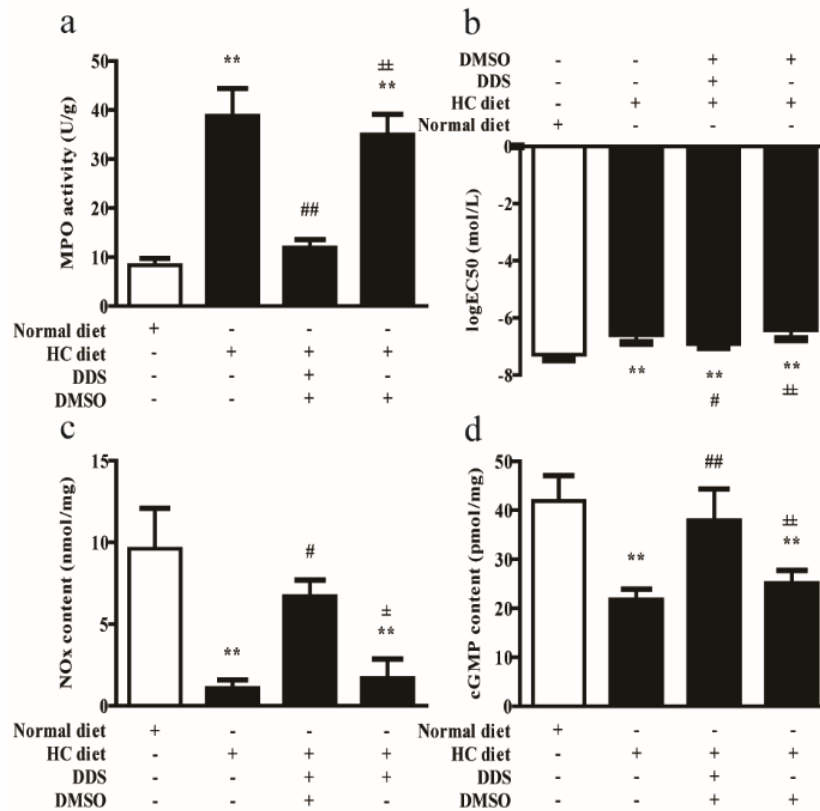

### Supplementary figure Legend:

The changes of MPO activity, log EC<sub>50</sub> value of ACh-induced vasodilation, NOx content and cGMP level in thoracic aorta tissue with HC+DMSO group. (a) MPO activity; (b) log EC<sub>50</sub> value of ACh-induced vasodilation; (c) NOx content; (d) cGMP content. \*\**P* < 0.01 vs. Normal diet group; #*P* < 0.05, ##*P* < 0.01 vs. HC diet group; ±*P* < 0.05, ±±*P* < 0.01 vs. HC diet + DDS group. n = 6-10 rats/group.
